# Supplementary material for: Diffusion of curcumin in PLGA-based carriers for drug delivery: a molecular dynamics study
Source: Springer Nature journal article supplement (doi:10.1007/s00894-024-06023-x), 2024-06-19
Supplement: MOESM1 [file 894_2024_6023_MOESM1_ESM.pdf]

# Diffusion of curcumin in PLGA-based carriers for drug delivery: A molecular dynamics study

## – Supplementary Material –

Alessandro De Giorgi,<sup>†</sup> Francesco Bellussi,<sup>†</sup> Stefano Parlani,<sup>†</sup> Andrea Lucisano,<sup>†</sup>  
Emanuele Silvestri,<sup>†</sup> Susmita Aryal,<sup>‡</sup> Sanghyo Park,<sup>‡</sup> Jaehong Key,<sup>\*,‡</sup> and  
Matteo Fasano<sup>\*,†</sup>

<sup>†</sup>*Department of Energy, Politecnico di Torino, Torino, Italy*

<sup>‡</sup>*Department of Biomedical Engineering, Yonsei University, Wonju, Republic of Korea*

E-mail: jkey@yonsei.ac.kr; matteo.fasano@polito.it

In this document we provide supplementary notes, tables and figures with additional details on model development and obtained results.

## Supplementary Notes

### Supplementary Note 1: Tukey's method

Tukey's method is based on measures such as the interquartile range, where the lower and the upper quartiles of a series of measurements are used as range to detect as an outlier any observation outside it. A mathematical formulation for the range is:

$$[Q_1 - k(Q_2 - Q_1), Q_2 + k(Q_2 - Q_1)], \quad (S1)$$

where  $Q_1$  and  $Q_2$  are the lower and upper quartiles, respectively, and  $k$  is a constant which is equal to 1.5 in the Tukey's method.<sup>1</sup> Thus, when an outlier value for  $D$  was found during a MD trajectory, the simulation to which it belonged was run again, in order to get rid of it.

### Supplementary Note 2: Design of Experiment

A Design of Experiment (DOE) is a statistical approach that differs from a traditional experimental method. The latter performs a loop such as developing a theoretical hypothesis, performing a trial to confirm such hypothesis, analyzing results, finding corrections to make, and performing further experiments until a good result is reached. Such a method can result in a long and not optimized process and furthermore it requires both a complete theoretical knowledge of the studied factors and the capability to control them. A DOE mitigates this disadvantages and it is more adequate to this study case, since the diffusion mechanism of curcumin in PLGA was relatively unknown and dependent on numerous variables. The chosen structure of the DOE is the so called Taguchi Method.

Taguchi Method (TM) is an alternative to a full-factorial method (FFM), because both take into account the possibility of interactions among parameters considering that the model sensitivity to one parameter can change depending on the values of other parameters. A FFM analysis generally requires a large number of experiments, which is impractical for time

consuming simulations such as MD ones. Furthermore, the expected experiments result to be often redundant, adding little or even no new information. Hence, TM results particularly adapt to this case, since it does not require too many trials. An orthogonal array (OA) is used to reduce the number of simulations and obtain reasonable information.<sup>2</sup> Writing the orthogonal array matrix involves a procedure also known as the *fractional factorial design* technique.

In the considered domain, the three input variables to be explored are: the hydration level, the PLGA length, and density. Considering these three variables and three levels per each one of them, the TM required a number of trials equal to  $3^2$ . Hence a L9 matrix was designed, meaning that the design space is composed by three values for each sample and thus nine possible configurations to be simulated.

After the DOE structure and the orthogonal matrix have been written, the next step is to conduct the matrix experiment. The following protocol was followed to build the target MD configurations:

1. Placing the curcumin in the center of a sphere formed by packed PLGA chains with a given length.
2. Loading the packed ensemble in an opportunely large cubic box.
3. Performing an energy minimization of the system to relax the compacted chains.
4. Introducing a number of water molecules in the computational box needed to reach the target hydration level, performing a further energy minimization after the solvation process. The water density was computed with respect to the solvent accessible volume in the box.
5. Performing a series of NVT and NPT simulations to equilibrate the temperature and pressure of the system and reach the target PLGA density, while adjusting the number of water molecules with the updated solvent accessible volume in the box. An accept-

able margin of error on the final PLGA density was established to be  $\pm 5\%$  with respect to the target values.

The final box size, number of water molecules and number of total atoms for DOE1 and DOE2 are summarized in Tabs. S3 and S4. After performing this preparation procedure for all configurations prescribed by TM, NVT production runs are carried out to generate statistically relevant trajectories (5 ns) and finally to post-process the diffusivities of water, PLGA, and curcumin molecules.

### Supplementary Note 3: Simulation convergence

The time evolution of the MSD for all the simulations of DOE1 and DOE2 are presented in Figs. S1, S2, S3, S4, S5 and S6. Each  $D$  value was calculated from the linear fitting of these MSD trajectories, following the Einstein relation. As it can be noticed from Figs. S1, S2, S3, S4, S5 and S6, all simulations are stable, with diffusivity values that pass the Tukey's method check, proving the convergence of results.

Additionally, a test simulation (*i.e.*, sim 7 of DOE1) was conducted for up to 10 ns to check the system's convergence. As shown in Fig. S7, the mean squared displacement (MSD) of each species remains stable over time. We calculated the diffusion coefficients for this extended simulation, obtaining the following results: for water,  $D = 11.176 \cdot 10^{-12} m^2/s$ ; for curcumin,  $D = 0.649 \cdot 10^{-12} m^2/s$ ; and for PLGA,  $D = 0.592 \cdot 10^{-12} m^2/s$ . The percentage relative errors between the 10 ns and 5 ns simulations were then computed for each species, yielding a discrepancy of 4.82% for water, 2.14% for curcumin, and 0.42% for PLGA. Thus, we considered the differences between the diffusion coefficients to be negligible and regarded all the 5 ns simulations as sufficiently long to guarantee convergence. The resulting diffusion coefficients and the linear fitting interval times for each simulation are summarized in Tabs. S1 and S2 for DOE1 and DOE2, respectively.

# Supplementary Tables

Table S1: Diffusion coefficients and linear fitting interval time for DOE1.

| Sim | Curcumin                              |                                   | PLGA                                |                                   | Water                               |                                   |
|-----|---------------------------------------|-----------------------------------|-------------------------------------|-----------------------------------|-------------------------------------|-----------------------------------|
|     | $D_C$ [ $10^{-12}$ m <sup>2</sup> /s] | Linear fitting time interval [ps] | $D$ [ $10^{-12}$ m <sup>2</sup> /s] | Linear fitting time interval [ps] | $D$ [ $10^{-12}$ m <sup>2</sup> /s] | Linear fitting time interval [ps] |
| 1   | 4.882                                 | 50-4000                           | 6.868                               | 50-4000                           | 171.270                             | 50-5000                           |
| 2   | 0.071                                 | 50-5000                           | 0.096                               | 50-5000                           | 2.126                               | 50-5000                           |
| 3   | 0.079                                 | 50-5000                           | 0.102                               | 50-5000                           | 0.139                               | 50-5000                           |
| 4   | 0.521                                 | 50-5000                           | 0.582                               | 50-5000                           | 77.225                              | 50-4000                           |
| 5   | 0.022                                 | 50-5000                           | 0.022                               | 50-4000                           | 0.049                               | 50-4000                           |
| 6   | 0.045                                 | 50-5000                           | 0.127                               | 50-5000                           | 25.460                              | 50-5000                           |
| 7   | 0.663                                 | 50-5000                           | 0.590                               | 50-5000                           | 10.663                              | 50-5000                           |
| 8   | 0.178                                 | 50-5000                           | 0.333                               | 50-5000                           | 55.770                              | 50-5000                           |
| 9   | 0.076                                 | 50-5000                           | 0.086                               | 50-4000                           | 4.613                               | 50-5000                           |

Table S2: Diffusion coefficients and linear fitting interval time for DOE2. N.A. refers to Not Applicable, when water molecules are not included in the simulation.

| Sim | Curcumin                              |                                   | PLGA                                |                                   | Water                               |                                   |
|-----|---------------------------------------|-----------------------------------|-------------------------------------|-----------------------------------|-------------------------------------|-----------------------------------|
|     | $D_C$ [ $10^{-12}$ m <sup>2</sup> /s] | Linear fitting time interval [ps] | $D$ [ $10^{-12}$ m <sup>2</sup> /s] | Linear fitting time interval [ps] | $D$ [ $10^{-12}$ m <sup>2</sup> /s] | Linear fitting time interval [ps] |
| 1   | 6.270                                 | 50-5000                           | 7.422                               | 50-5000                           | N.A.                                | N.A.                              |
| 2   | 9.436                                 | 50-4000                           | 9.972                               | 50-4000                           | 165.250                             | 50-5000                           |
| 3   | 1.644                                 | 50-5000                           | 1.469                               | 50-4000                           | N.A.                                | N.A.                              |
| 4   | 0.492                                 | 50-4000                           | 0.652                               | 50-4000                           | 4.165                               | 50-5000                           |
| 5   | 0.107                                 | 50-1000                           | 0.126                               | 50-1000                           | 0.145                               | 50-4000                           |
| 6   | 1.901                                 | 675-4000                          | 2.054                               | 50-4000                           | N.A.                                | N.A.                              |
| 7   | 4.770                                 | 50-1000                           | 2.135                               | 50-5000                           | 78.371                              | 50-5000                           |
| 8   | 0.274                                 | 2600-5000                         | 0.571                               | 50-5000                           | 76.922                              | 50-4000                           |

Table S3: Box size, number of water molecules and total number of atoms for DOE1.

| Sim | Box size (x = y = z) [nm] | Water molecules | Number of atoms |
|-----|---------------------------|-----------------|-----------------|
| 1   | 2.87657                   | 477             | 2843            |
| 2   | 2.64874                   | 497             | 2903            |
| 3   | 2.45745                   | 497             | 2903            |
| 4   | 3.54251                   | 892             | 6197            |
| 5   | 3.32699                   | 986             | 6470            |
| 6   | 4.01852                   | 2170            | 10022           |
| 7   | 5.66354                   | 3650            | 27557           |
| 8   | 6.33239                   | 6800            | 37007           |
| 9   | 6.15751                   | 7810            | 40037           |

Table S4: Box size, number of water molecules and total number of atoms for DOE2.

| <b>Sim</b> | <b>Box size (x = y = z) [nm]</b> | <b>Water molecules</b> | <b>Number of atoms</b> |
|------------|----------------------------------|------------------------|------------------------|
| <b>1</b>   | 2.87567                          | 0                      | 1412                   |
| <b>2</b>   | 2.87567                          | 239                    | 2129                   |
| <b>3</b>   | 3.32699                          | 0                      | 3512                   |
| <b>4</b>   | 3.32699                          | 370                    | 4622                   |
| <b>5</b>   | 3.32699                          | 739                    | 5729                   |
| <b>6</b>   | 6.10046                          | 0                      | 16607                  |
| <b>7</b>   | 6.10046                          | 2280                   | 23447                  |
| <b>8</b>   | 6.10046                          | 4560                   | 30287                  |

## Supplementary Figures

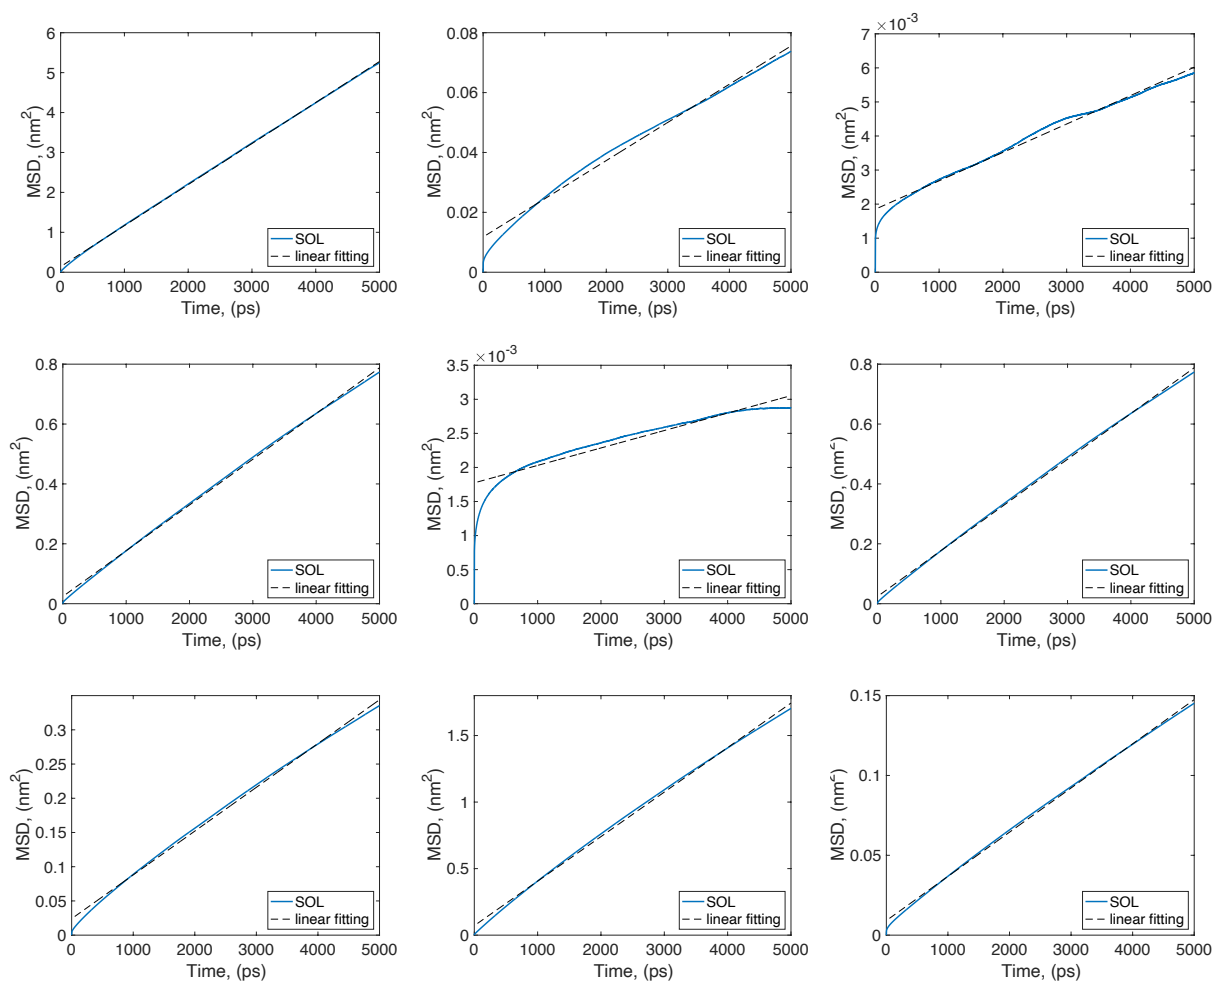

Figure S1: Time evolution of solvent MSD in DOE1 with linear fitting for  $D$  calculation, from configuration 1 to 9 (from left to right; from top to bottom).

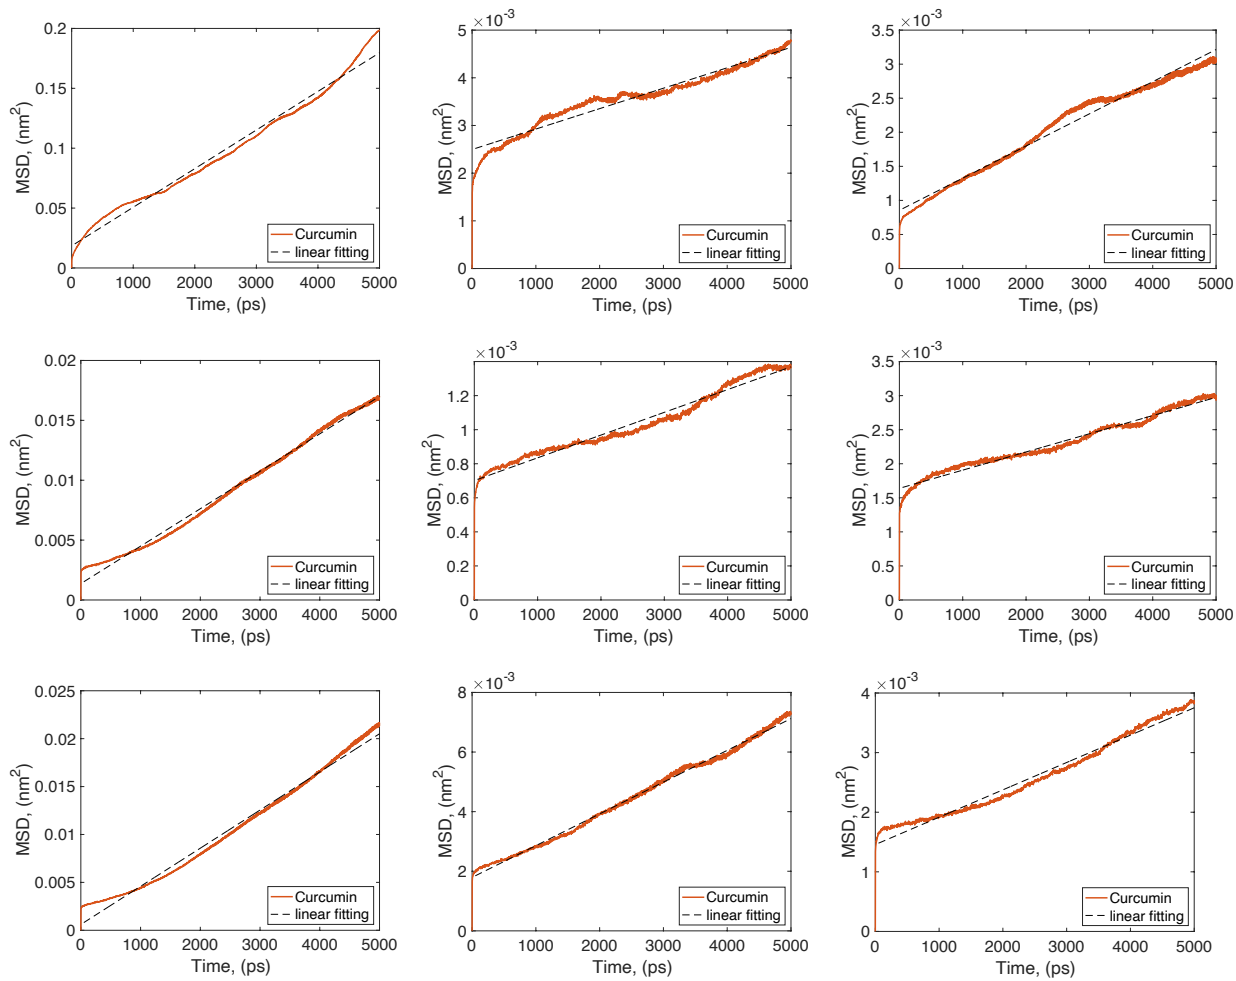

Figure S2: Time evolution of curcumin MSD in DOE1 with linear fitting for  $D$  calculation, from configuration 1 to 9 (from left to right; from top to bottom).



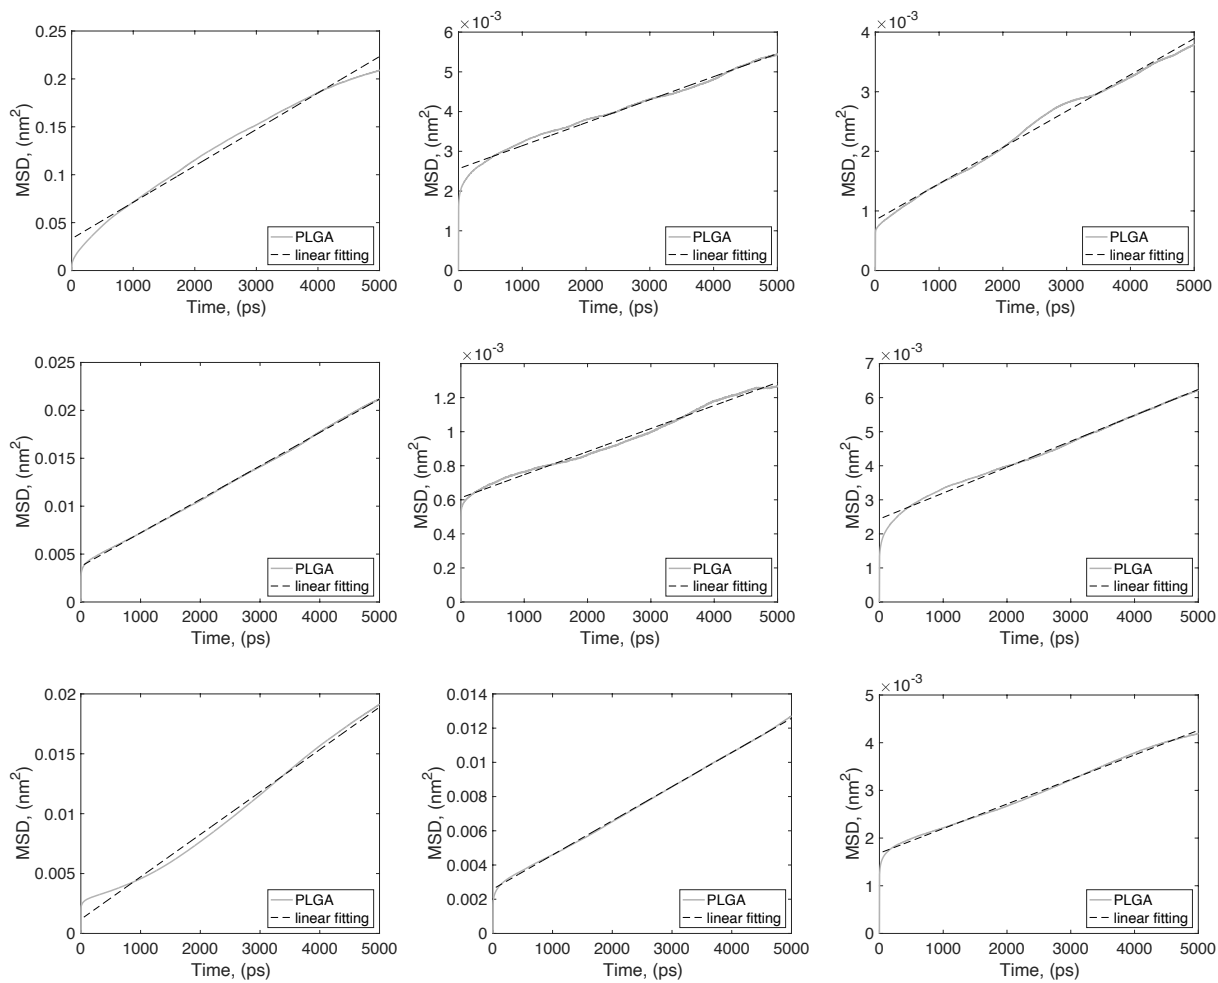

Figure S3: Time evolution of PLGA MSD in DOE1 with linear fitting for  $D$  calculation, from configuration 1 to 9 (from left to right; from top to bottom).

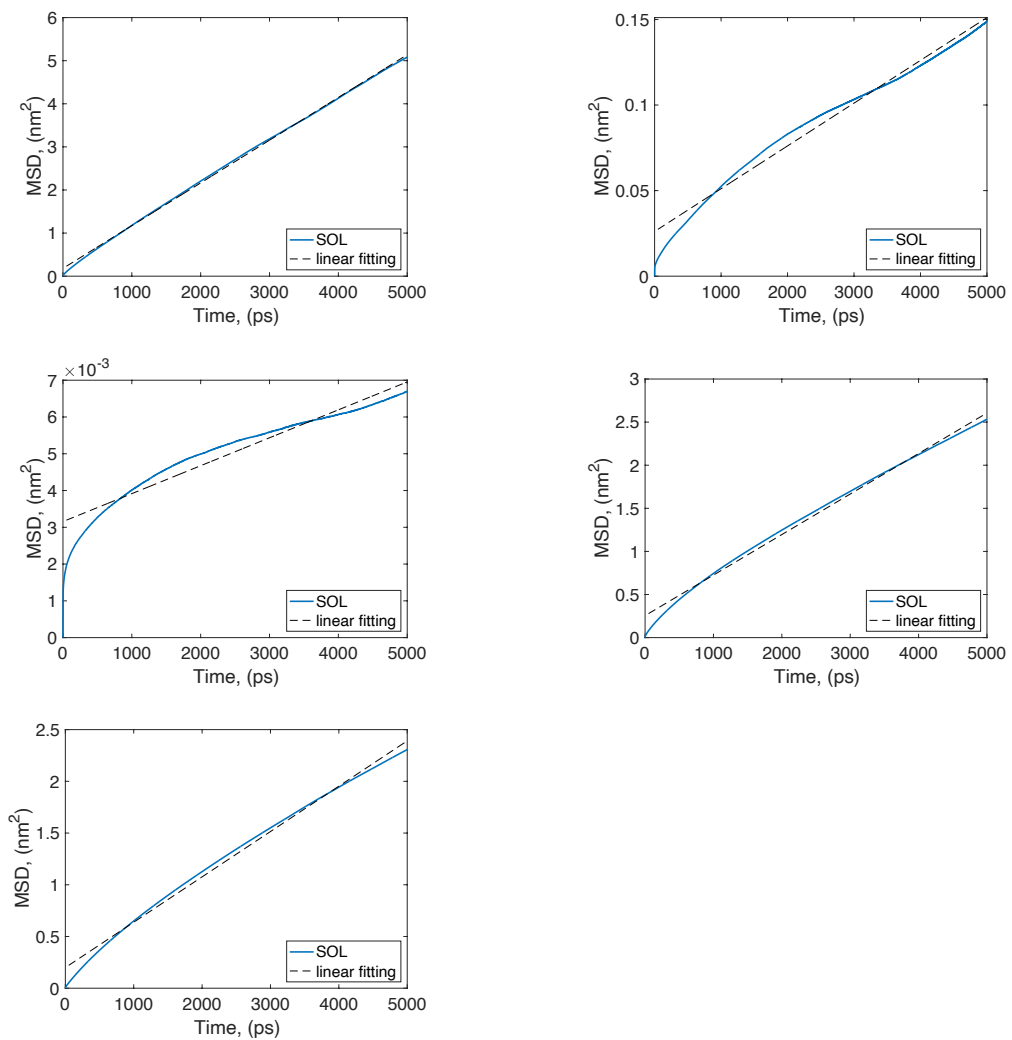

Figure S4: Time evolution of solvent MSD in DOE2 with linear fitting for  $D$  calculation, from configuration 2 to 8, ignoring 3 and 6 in which there is no solvent (from left to right; from top to bottom).

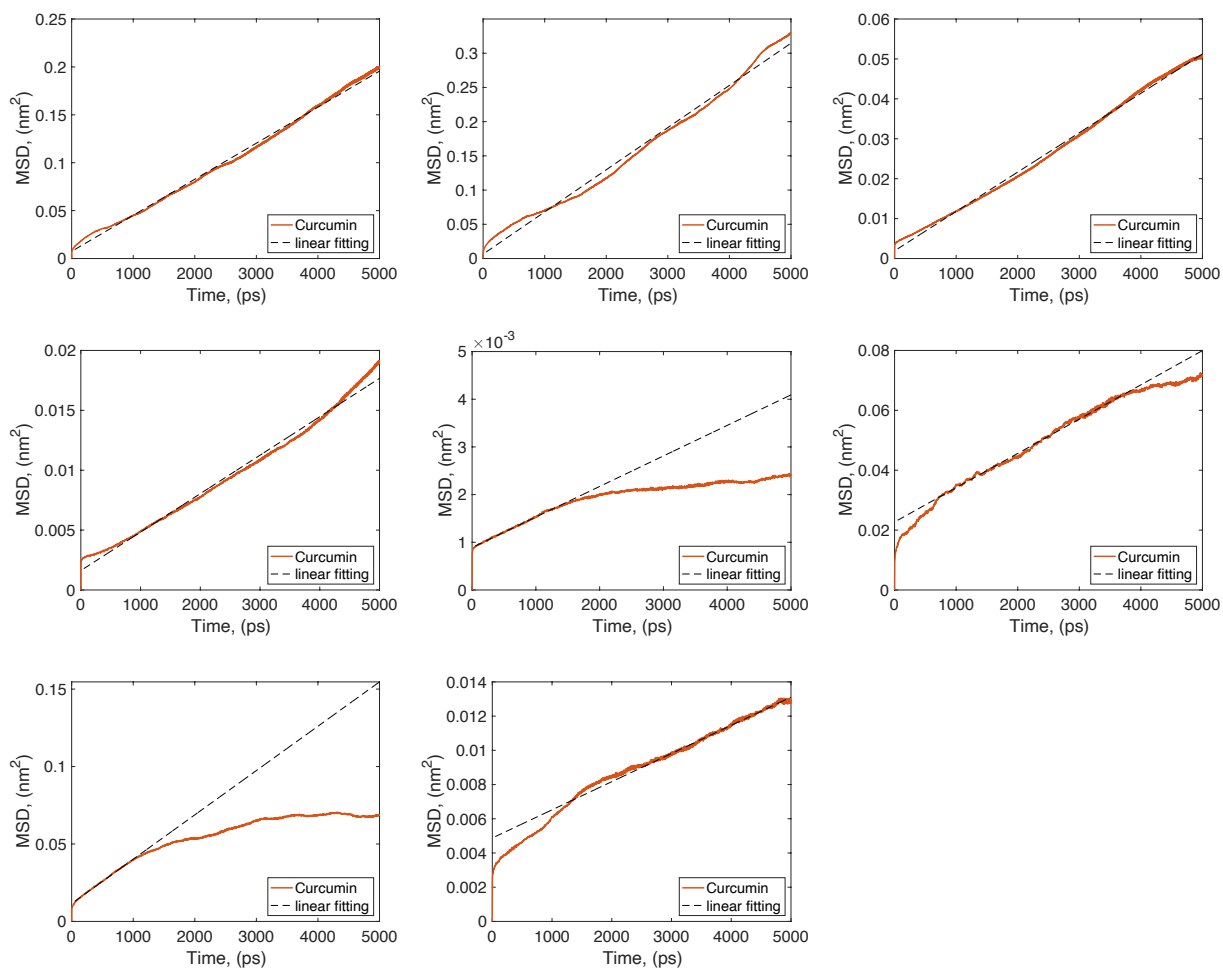

Figure S5: Time evolution of curcumin MSD in DOE2 with linear fitting for  $D$  calculation, from configuration 1 to 8, (from left to right; from top to bottom).

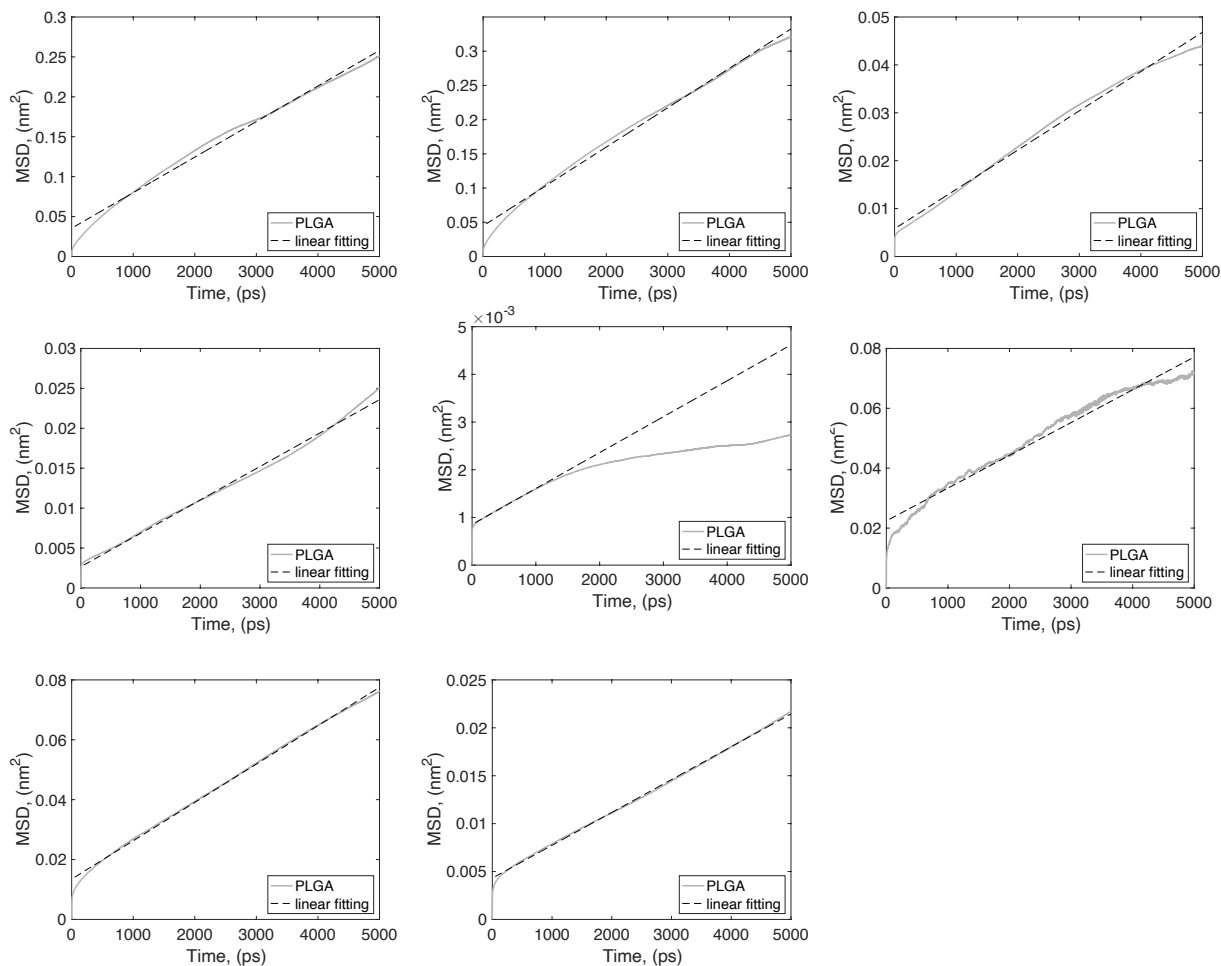

Figure S6: Time evolution of PLGA MSD in DOE2 with linear fitting for  $D$  calculation, from configuration 1 to 8, (from left to right; from top to bottom).

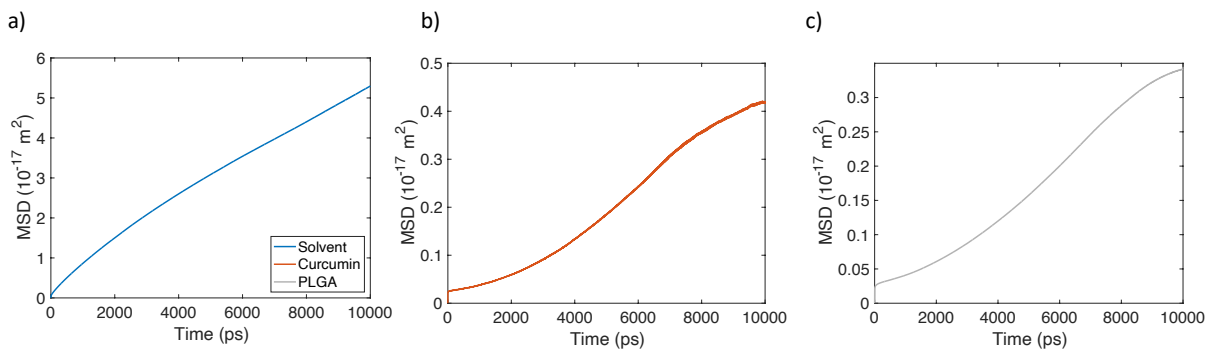

Figure S7: 10 ns time evolution of MSD in a simulation test (DOE1, sim7).

## References

- (1) Seo, S. A review and comparison of methods for detecting outliers in univariate data sets. *BS, Kyunghee University* **2002**,
- (2) Qi, L.; Mikhael, C. S.; Funnell, W. R. J. Application of the Taguchi method to sensitivity analysis of a middle-ear finite-element model. **2004**,
